# Supplementary material for: Role of PA2G4P4 pseudogene in bladder cancer tumorigenesis
Source: MDPI journal article supplement (doi:10.3390/biology9040066), 2020-03-31
Supplement: s1 [file s1]

## Supplementary Materials

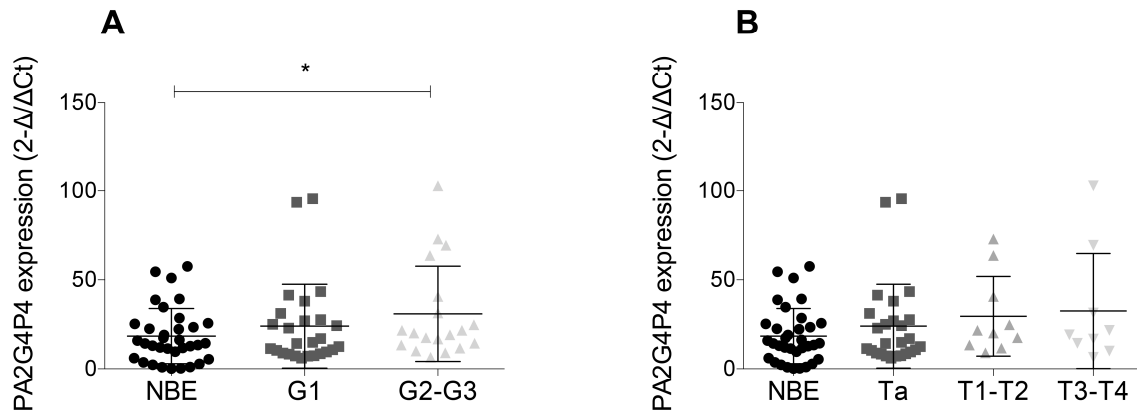

**Figure S1.** PA2G4P4 expression in BICa tissues. PA2G4P4 expression level in NBE samples and BICa according to their grading (A) and staging (B) stratification. P-values were obtained using the non-parametric Mann–Whitney U test (\*  $p < 0.05$ ).

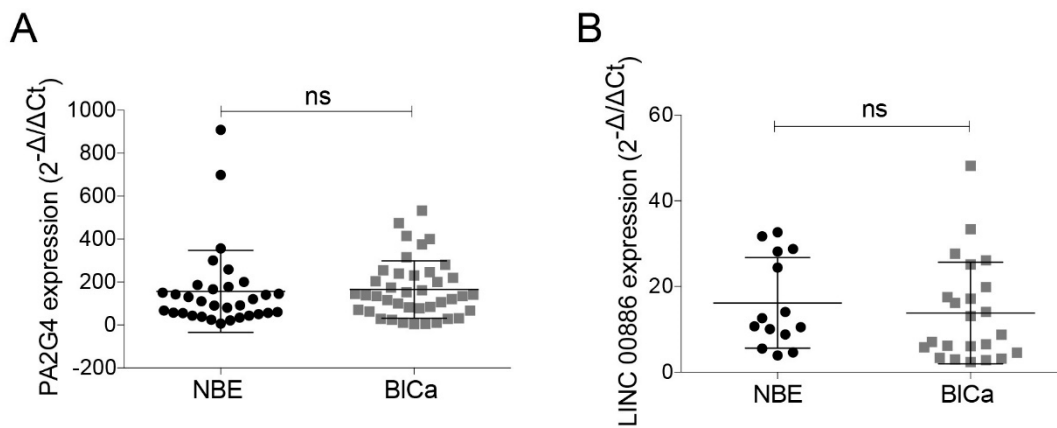

**Figure S2.** PA2G4 and LINC00886 expression in BICa tissues. (A) PA2G4 and (B) LINC00886 mRNA quantification assessed by RT-qPCR. BICa, bladder cancer; PA2G4P4, proliferation-associated 2G4 pseudogene 4; NBE, normal bladder epithelium.

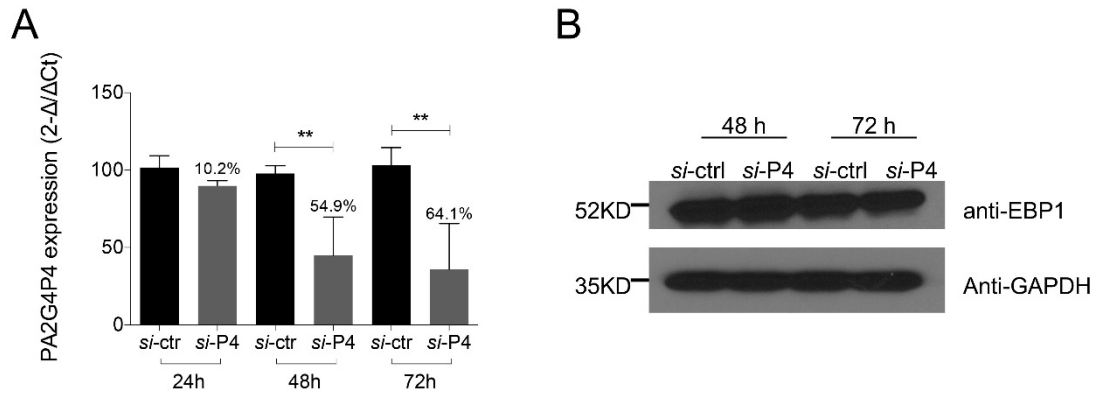

**Figure S3.** PA2G4P4 silencing in J82 cell line. **(A)** Analysis of PA2G4P4 mRNA depletion 48 and 72 h after J82 transfection with specific si-P4 (\*\* $p < 0.005$ ). **(B)** Western blot performed using anti-EBP1 and anti GAPDH antibodies. The analysis was PA2G4P4, proliferation-associated 2G4 pseudogene 4; EBP1, ErbB3-binding protein 1.
